# Supplementary material for: Influence of the fullerene LUMO level on the stability of bulk heterojunction solar cells
Source: Royal Society of Chemistry journal article supplement (doi:10.1039/d1tc01459e), 2021-01-01
Supplement: d1tc01459e1.pdf [file d1tc01459e1.pdf]

## Supplementary Information

### Influence of the Fullerene LUMO Level on the Stability of Bulk Heterojunction Solar Cells

A. Distler, K.-S. Cheon, D. Waller, D. Guldi, J. Hauch, H.-J. Egelhaaf

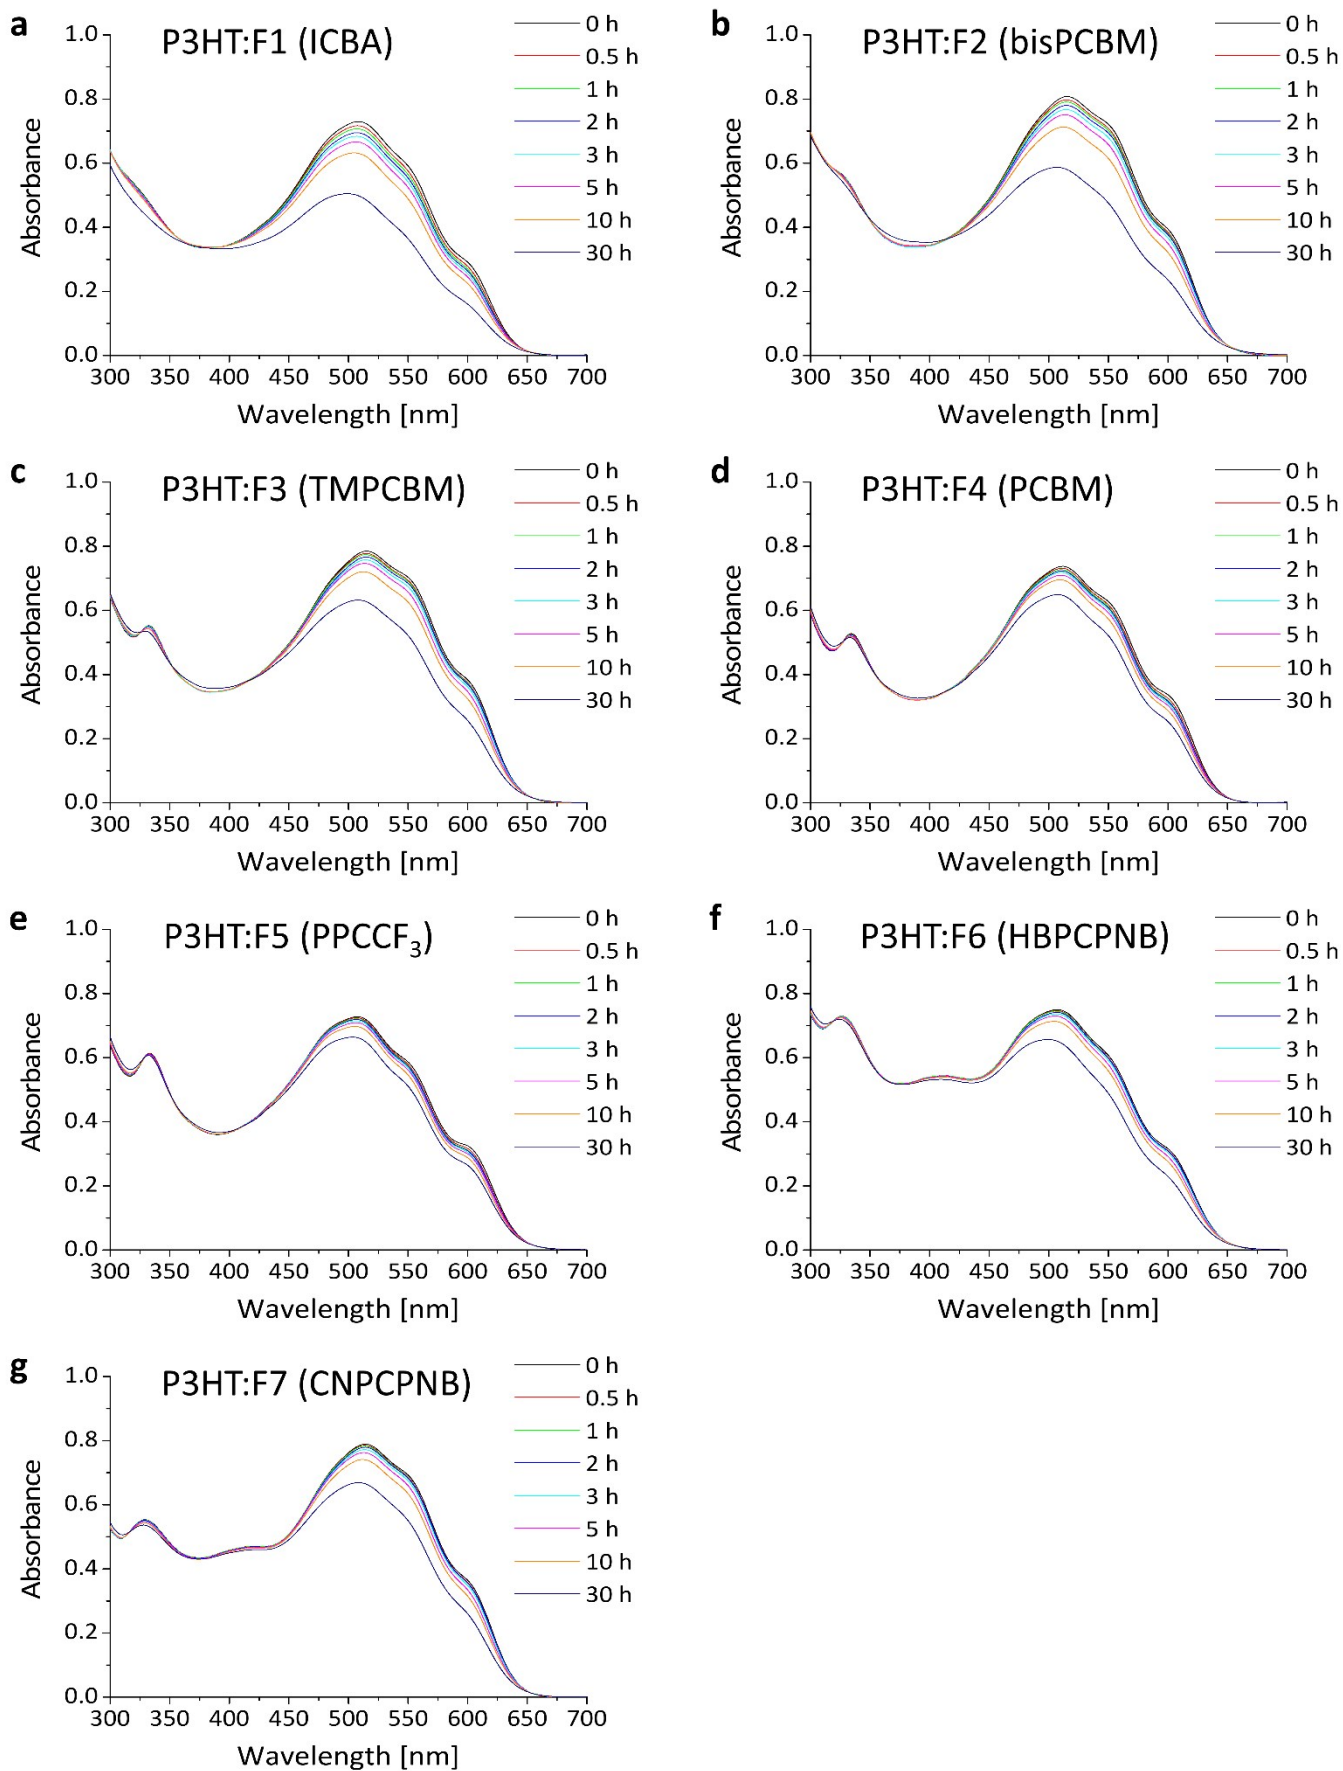

Figure S1: UV/vis spectra of all P3HT:fullerene (1:0.7) blend films after different times of irradiation under ambient air.



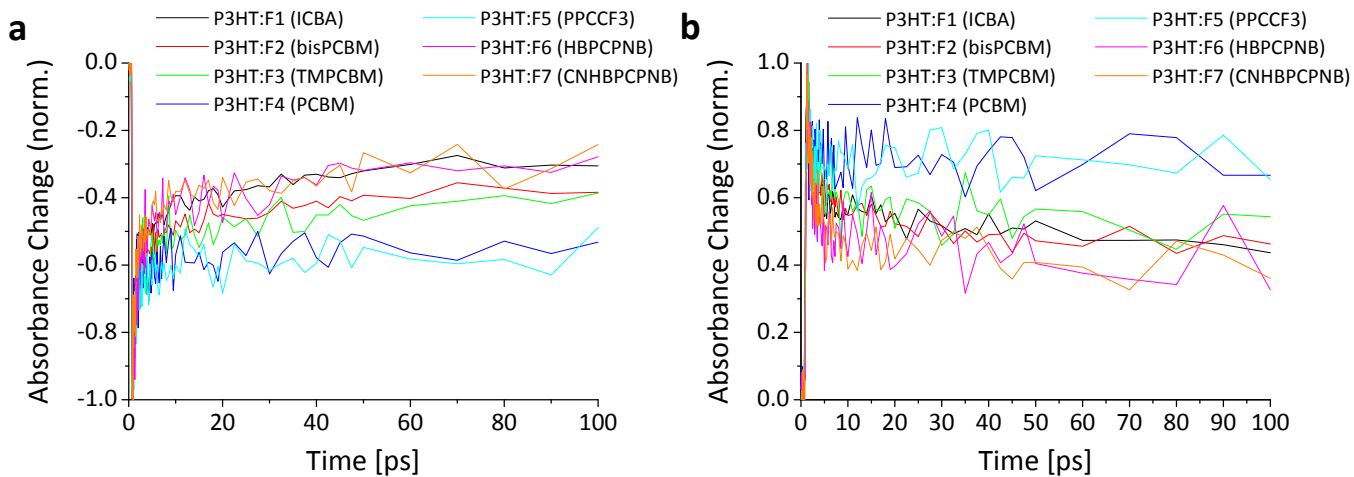

**Figure S2:** Normalized time absorption profile of the ground state bleaching at 510 nm (a) and the polaron signal at 650 nm (b) for all P3HT:fullerene blends.

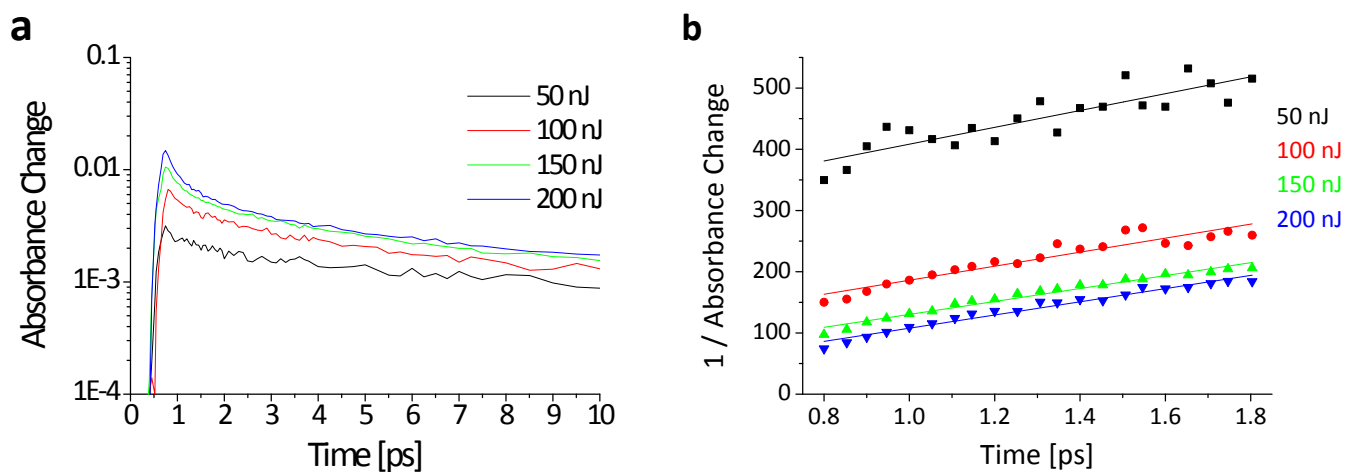

**Figure S3:** Normalized time absorption profile of the exciton signal at 1200 nm of a P3HT:F5 film for different pump energies during the first 10 ps (a) and the respective reciprocal during the first picosecond including linear fits (b) indicating the initial bimolecular kinetics due to  $S_1$ - $S_1$  annihilation.
